# Supplementary material for: Co-processing CH4 and oxygenates on Mo/H-ZSM-5: 2. CH4–CO2 and CH4–HCOOH mixtures
Source: Royal Society of Chemistry journal article supplement (doi:10.1039/c3cp50855b), 2013-01-01
Supplement: c3cp50855b.pdf [file c3cp50855b.pdf]

## Co-processing CH<sub>4</sub> and Oxygenates on Mo/HZSM-5: 2. CH<sub>4</sub>/CO<sub>2</sub> and CH<sub>4</sub>/HCOOH Mixtures

Jeremy Bedard, Do-Young Hong, and Aditya Bhan

### Supplementary Information

The tabulated results presented in Table S.1 show the observed product distribution and conversion for co-processing CO<sub>2</sub>/CH<sub>4</sub>, CH<sub>3</sub>COOH/CH<sub>4</sub>, and HCOOH/CH<sub>4</sub> mixtures at 950 K. All data reported were recorded at 11 ks time-on-stream.

**Table S.1:** CH<sub>4</sub> conversion and product carbon selectivity for DHA reactions over Mo/H-ZSM-5 catalyst at 950 K, CH<sub>4</sub> flow rate 12.0 cm<sup>3</sup> min<sup>-1</sup>, CH<sub>4</sub>:Ar = 9:1, catalyst loading 1 g with Mo:Al<sub>f</sub> = 0.25, and time-on-stream 11 ks.

| Oxygenate                                   | CO <sub>2</sub> | AA   | FA   |
|---------------------------------------------|-----------------|------|------|
| O*/CH <sub>4</sub> (/10 <sup>-5</sup> )     | 1.8             | 1.5  | 1.7  |
| CH <sub>4</sub> conversion (%) <sup>a</sup> | 8.6             | 6.3  | 8.2  |
| Selectivity (%) <sup>b</sup>                |                 |      |      |
| CO                                          | 62.0            | 54.1 | 41.2 |
| C <sub>2</sub> H <sub>4</sub>               | 1.0             | 1.3  | 1.5  |
| C <sub>2</sub> H <sub>6</sub>               | 1.1             | 1.2  | 1.6  |
| C <sub>6</sub> H <sub>6</sub>               | 22.6            | 29.5 | 36.7 |
| C <sub>7</sub> H <sub>8</sub>               | 1.0             | 1.4  | 1.7  |
| C <sub>10</sub> H <sub>8</sub>              | 11.1            | 11.6 | 15.6 |
| C <sub>10</sub> <sup>+</sup>                | 1.2             | 0.9  | 1.5  |

$$^a \text{Conv}_{CH_4} = \frac{F_{CH_4}^{Inlet} - F_{CH_4}^{Outlet}}{F_{CH_4}^{Inlet}} \quad ^b \% S_i = \frac{n_i * F_i}{\sum_i n_i * F_i}$$
